# Supplementary material for: Bi-functionality of organic acids as acid catalysts and a hydrogen source for one-pot production of secondary amines from primary amines and aromatic aldehydes over an Au–C3N4 photocatalyst
Source: Royal Society of Chemistry journal article supplement (doi:10.1039/d4nj05500d), 2025-01-01
Supplement: d4nj05500d1.pdf [file d4nj05500d1.pdf]

## Supplementary Information

### **Bi-functionality of organic acids as acid catalysts and hydrogen source for one-pot production of secondary amines from primary amines and aromatic aldehydes over an Au-C<sub>3</sub>N<sub>4</sub> photocatalyst**

Hiroshi Kominami,<sup>1\*</sup> Xiangru Liu,<sup>2</sup> Atsuhiko Tanaka<sup>1</sup>

<sup>1</sup>Department of Applied Chemistry, Faculty of Science and Engineering, Kindai University, 3-4-1, Kowakae, Higashiosaka, Osaka 577-8502, Japan

<sup>2</sup>Department of Molecular and Material Engineering, Graduate School of Science and Engineering, Kindai University, 3-4-1, Kowakae, Higashiosaka, Osaka 577-8502, Japan

## Experimental

### 1. Chemicals

All chemicals (guaranteed reagents) were purchased from FUJIFILM Wako Pure Chemical, Osaka and used without further purification except for alcohols, which were dried before reactions using molecular sieves.

### 2. Preparation of $C_3N_4$

Melamine and urea were mixed in an alumina crucible in a 1:9 mass ratio. The crucible was covered with a lid and heated in a muffle furnace at  $450^\circ\text{C}$  under a continuous flow of nitrogen gas. The solid product was crushed in a mortar, suspended in a sulfuric acid solution with pH of 4 for 4 h, and washed with distilled water. After suction filtration, the sample was dried in an incubator under vacuum for 4 h and then in an oven at  $80^\circ\text{C}$  for 12 h.

### 3. Preparation of Au- $C_3N_4$

$C_3N_4$  powder (99 mg) was suspended in a mixture of methanol ( $1\text{ cm}^3$ ), an aqueous solution of tetrachloroauric(III) acid ( $\text{HAuCl}_4$ ,  $1\text{ cm}^3$ ) and water ( $8\text{ cm}^3$ ) in a test tube. The test tube was sealed with a rubber septum under argon (Ar). Loading of Au nanoparticles on  $C_3N_4$  was achieved through a repetitive cycle of photodeposition (P) and ultrasonic treatment (U). Photodeposition was conducted at  $20^\circ\text{C}$  in a water bath, using a 400 W high-pressure mercury arc (KPI, Hyogo, Japan) as the UV light source ( $\lambda > 300\text{ nm}$ ) to facilitate the reduction of Au(III) to Au(0) on the surface of  $C_3N_4$ . Ultrasonic treatment was subsequently applied to reduce the size of Au particles loaded on the surface of  $C_3N_4$ . The sequence of P and U was repeated as follows: P5-U1-P15-U1-P30-U1-P60-U1-P90 (number indicating time in minutes). Subsequently, the Au-loaded  $C_3N_4$  (Au- $C_3N_4$ ) was washed with distilled water, dried for 4 h under vacuum, and

then dried in an oven at 80°C for 12 h. Atomic absorption spectrometry for the liquid phase after the photodeposition revealed that Au was almost quantitatively loaded on C<sub>3</sub>N<sub>4</sub>.

#### 4. Characterization

Powder X-ray diffraction of C<sub>3</sub>N<sub>4</sub> was recorded on a MiniFlex (Rigaku, Tokyo, Japan) in the Joint Research Center (JRC) at Kindai University using CuK $\alpha$  radiation with a monochromator. Fourier transform infrared (FT-IR) spectra of samples were measured on an FT-IR spectrometer (FT/IR-6600, JASCO, Tokyo, Japan), and a KBr pellet of the sample was previously prepared in vacuo. Diffuse reflectance spectra of the samples were acquired using a UV-visible spectrometer (UV-2400, Shimadzu, Kyoto) together with a diffuse reflectance measurement unit (ISR-2000, Shimadzu). Morphology and particle size of the prepared samples were observed under a scanning electron microscope (SEM, S-4800, Hitachi, Tokyo) after platinum sputtering and under a transmission electron microscope (TEM, JEM-2100F, JEOL, Tokyo) operated at 200 kV in JRC at Kindai University. The specific surface areas of samples were calculated using the BET single point method based on nitrogen uptake measured at -196°C.

#### 5. Formation of imine by condensation of aldehyde and amine in the dark

Fifty mg of C<sub>3</sub>N<sub>4</sub> or Au-C<sub>3</sub>N<sub>4</sub> was suspended in 5 cm<sup>3</sup> of 2-propanol (guaranteed reagents, FUJIFILM Wako Pure Chemical) in the absence and presence of an organic acid (100  $\mu$ mol) in a test tube. After sealing the tube with a rubber septum under argon (Ar), an alcohol solution containing BAD (50  $\mu$ mol) and an alcohol solution containing AN (45  $\mu$ mol) were quickly injected into the test tube in that order. The suspension was stirred in the dark for 1 h until the condensation of AN and BAD reached an equilibrium. The compounds (BAD, AN and BAN) in the liquid phase were analyzed by an FID-type gas

chromatograph (GC-2025, Shimadzu) with a DB-1 column. Toluene was used as the internal standard sample.

#### 6. Photocatalytic hydrogenation of imine to secondary amine over Au-C<sub>3</sub>N<sub>4</sub>

The suspension in the test tube after the above condensation process was photoirradiated with a high-pressure mercury arc (KPI) at 20°C. The compounds (BAD, AN, BAN and PBA) in the liquid phase were analyzed by an FID-type gas chromatograph (GC-2025, Shimadzu, Kyoto) with a DB-1 column. Unreacted 2-propanol and acetone that were formed in the liquid phase were analyzed by an FID-type gas chromatograph (GC-2025, Shimadzu) with a DB-WAX column. Toluene was used as the internal standard sample. Hydrogen (H<sub>2</sub>) and carbon dioxide (CO<sub>2</sub>) in the gas phase were analyzed by a TCD-type gas chromatographs (GC-8A, Shimadzu) with an MS-5A column and a Porapak Q-S column, respectively.

#### 7. Action spectrum measurement

To investigate the efficiency of light energy utilization at specific wavelengths in photocatalytic reactions, we calculated the apparent quantum efficiency (AQE) and measured action spectra. The reaction mixture was irradiated with visible light from an Xe lamp equipped with band-pass filters (Asahi Spectra, Tokyo, Japan). The quantity of PBA was quantified in accordance with the methodology described in the preceding section, after which AQE was determined by Equation 1.

$$\text{AQE} = \frac{2 \times \text{amount of PBA}}{\text{number of incident photons}} \times 100. \quad (1)$$

## Results

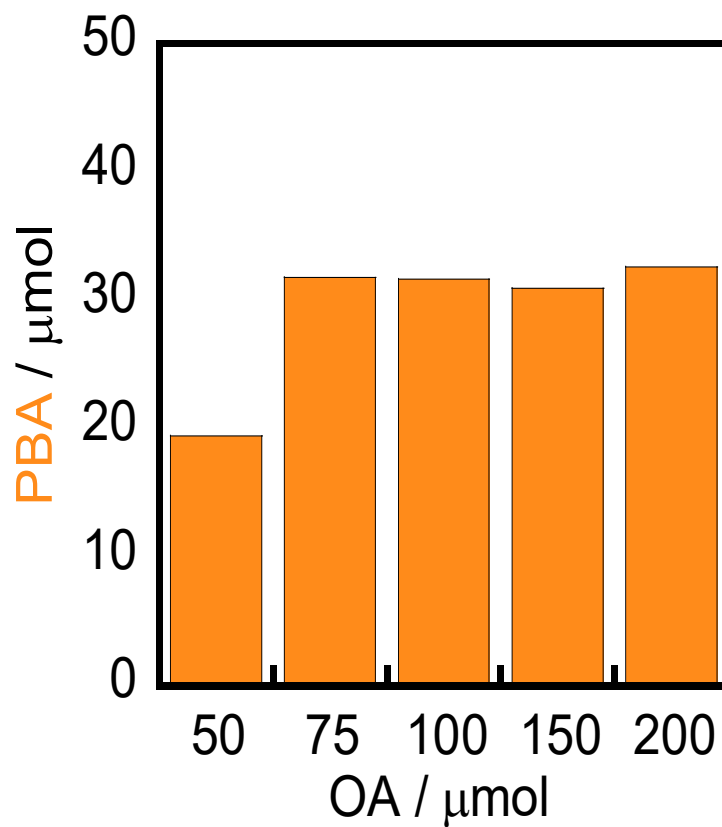

**Fig. S1** Effects of different amounts of OA on production of PBA from AN and BAD via BAN in a 2-propanol suspension. The reaction was carried out in the dark for the first 0.5 h and under irradiation of UV light from a mercury lamp for 3 h.

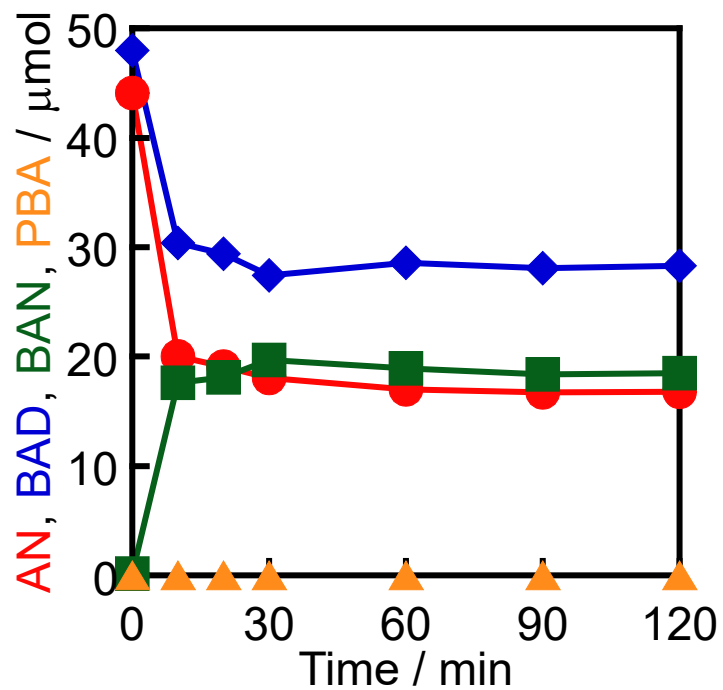

**Fig. S2** Time courses of the amounts of BAD ( $\blacklozenge$ ), AN ( $\bullet$ ), BAN ( $\blacksquare$ ) and PBA ( $\blacktriangle$ ) in a 2-propanol suspension of Au-C<sub>3</sub>N<sub>4</sub> in the presence of OA in the dark under 1 atm H<sub>2</sub>.

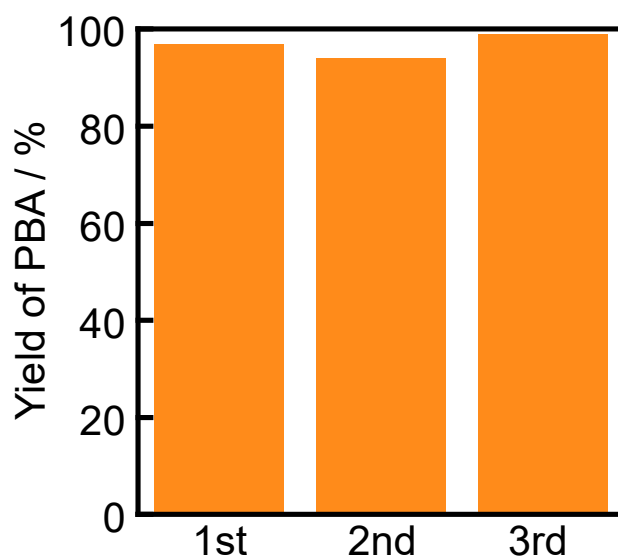

**Fig. S3** Durability test of 1 wt% Au-C<sub>3</sub>N<sub>4</sub> in production of PBA from AN and BAD via BAN in the 2-propanol suspension in the presence of OA as an acid catalyst and a hole scavenger. The reaction was carried out in the dark for 0.5 h and under irradiation of UV light from a mercury lamp for 5 h.
